# Supplementary material for: Evaluation of Anti-Melanogenesis Activity of Enriched Pueraria lobata Stem Extracts and Characterization of Its Phytochemical Components Using HPLC–PDA–ESI–MS/MS
Source: MDPI journal article supplement (doi:10.3390/ijms22158105), 2021-07-28
Supplement: s1 [file s1]

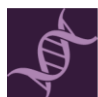

## Supplementary Materials

### Evaluation of anti-melanogenesis activity of enriched *Pueraria lobata* stem extracts and characterization of its phytochemical components using HPLC–PDA–ESI–MS/MS

Dan Gao <sup>1,†</sup>, Jin Hyeok Kim <sup>1,†</sup>, Cheong Taek Kim <sup>2</sup>, Won Seok Jeong <sup>2</sup>, Hyung Min Kim<sup>1</sup>, Jaehoon Sim <sup>1,\*</sup> and Jong Seong Kang <sup>2,\*</sup>

<sup>1</sup> College of Pharmacy, Chungnam National University, Daejeon, 34134, South Korea; [gaodan521361@hotmail.com](mailto:gaodan521361@hotmail.com) (D.G.); [oojh52@naver.com](mailto:oojh52@naver.com) (J.H.K.); [kimhm@cnu.ac.kr](mailto:kimhm@cnu.ac.kr) (H.M.K.)

<sup>2</sup> RNS Inc., Daejeon 34014, Korea; [happilion@biorns.com](mailto:happilion@biorns.com) (C.T.K.); [zmal1329@biorns.com](mailto:zmal1329@biorns.com) (W.S.J.)

\* Correspondence: [kangjss@cnu.ac.kr](mailto:kangjss@cnu.ac.kr) (J.S.K.); [jsim@cnu.ac.kr](mailto:jsim@cnu.ac.kr) (J.H.S.); Tel.: +82-42-821-5928 (J.S.K.); Tel.: +82-42-821-5938 (J.H.S.)

† Both authors contribute equally.

Table S1. Binding sites and docking affinity scores of the constituents identified from enriched PLS extract as determined using Autodock 4.2.

| <b>Compound</b> | <b>Binding energy (kcal/mol)</b> | <b>No. of H-bond</b> | <b>H-bond interacting residues</b> | <b>Van der Waals bond interacting residues</b>                        |
|-----------------|----------------------------------|----------------------|------------------------------------|-----------------------------------------------------------------------|
| Puerarin        | -3.18                            | 3                    | ASP17, ILE 241                     | ILE 241, ASN 260, ASN 93, ASN 255, ARG 245, GLN 107                   |
| Daidzin         | -3.43                            | 3                    | GLY259, ASP 17, CYS 92             | ARG 245, HIS 244, ASN 260, GLY 259, ASN 93, LEU 18                    |
| Kojic acid      | -4.32                            | 3                    | HIS 240, HIS 244, HIS 109          | ASN 260, MET 258, HIS 274, HIS 88, PHE 261, PHE 114, PHE 270, HIS 118 |

Table S2. The sequence of primers and PCR conditions used in this study.

| <b>Primer</b>  | <b>F/R</b> | <b>Sequences</b>           | <b>Cycle</b> | <b>Annealing (°C)</b> |
|----------------|------------|----------------------------|--------------|-----------------------|
| Tyrosinase     | F          | ATC GGC CAA CGA TCC CAT TT | 35           | 57                    |
|                | R          | TAG GTG GAT TGG CTT CTG GG |              |                       |
| $\beta$ -actin | F          | GAT GCC CTG AGG CTC TTT TC | 35           | 57                    |
|                | R          | TCA GCA ATG CCT GGG TAC TA |              |                       |
